# Supplementary material for: Medium-chain triglycerides improve lipid metabolism in obese rats through increasing the browning of adipose tissue via sympathetic regulation
Source: Royal Society of Chemistry journal article supplement (doi:10.1039/d2fo00239f), 2022-01-01
Supplement: d2fo00239f1.pdf [file d2fo00239f1.pdf]

## Supplementary materials

### **Medium Chain Triglycerides Improve Lipid Metabolism by Increasing the Thermogenesis through the Sympathetic Regulation System in Obese Rats**

Jiaheng Xia, Ping Yu, Zengling Zeng\*, Maomao Ma, Xianghui Yan, Junxin Zhao,  
Deming Gong, Guohua Zhang, Jun Wang

\* Corresponding author: Professor Zheling Zeng, PhD

State Key Laboratory of Food Science and Technology, Nanchang University,

Nanchang 330047, China

Jiangxi Province Key Laboratory of Edible and Medicinal Resources Exploitation,

Nanchang University, Nanchang 330031, China

School of Resource and Environmental and Chemical Engineering, Nanchang

University, Nanchang 330031, China

E-mail: zlzengjx@hotmail.com; zlzengjx@163.com

Tel.: +86-791-88510806      Fax: +86-791-88510806

| Antibodies       | Details                                    | Dilution |
|------------------|--------------------------------------------|----------|
| ATGL             | Proteintech,Rabbit Polyclonal, 55190-1-AP  | 1:1000   |
| HSL              | Affinity, Rabbit Polyclonal, AF6403        | 1:1000   |
| UCP1             | Abcam, Rabbit Polyclonal, ab234430         | 1:1000   |
| PRDM16           | Affinity, Rabbit Polyclonal,DF13303        | 1:1000   |
| CIDEA            | Proteintech, Rabbit Polyclonal, 13170-1-AP | 1:500    |
| Dio2             | Proteintech, Rabbit Polyclonal, 26513-1-AP | 1:800    |
| TBX1             | Affinity, Rabbit Polyclonal,AF0327         | 1:1000   |
| TH               | Affinity, Rabbit Polyclonal,AF6113         | 1:1000   |
| $\beta$ 3-AR     | Abcam, Rabbit Polyclonal, ab94506          | 1:800    |
| NGF              | Affinity, Rabbit Polyclonal,DF6061         | 1:1000   |
| BDNF             | Proteintech, Rabbit Polyclonal, 28205-1-AP | 1:2000   |
| NT-3             | Proteintech, Rabbit Polyclonal, 18084-1-AP | 1:2000   |
| NT-4             | Affinity, Rabbit Polyclonal,DF6226         | 1:1000   |
| PPAR $\gamma$    | Servicebio, Rabbit Polyclonal, GB11164     | 1:1000   |
| PGC-1 $\alpha$   | Proteintech, Mouse Monoclonal, 66369-1-Ig  | 1:2500   |
| $\beta$ -actin   | Proteintech, Mouse Monoclonal,66009-1-Ig   | 1:10000  |
| Goat anti- mouse | Proteintech, HRP conjugate, SA00001-1      | 1:5000   |
| Goat Anti-Rabbit | Proteintech, HRP conjugate, SA00001-2      | 1:5000   |

**Table S1 Primary Antibody Information**

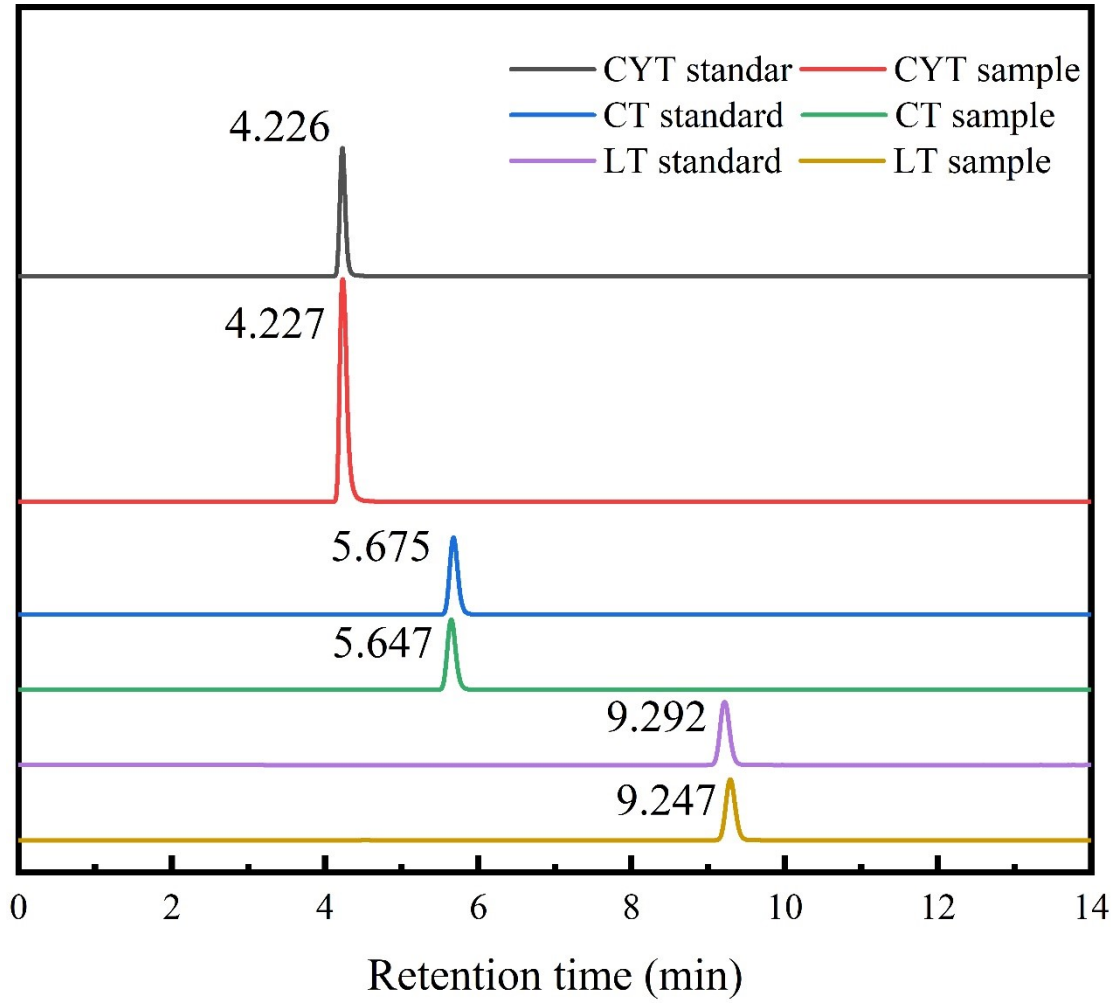

**Figure S1** The HPLC profile of CYT, CT and LT.

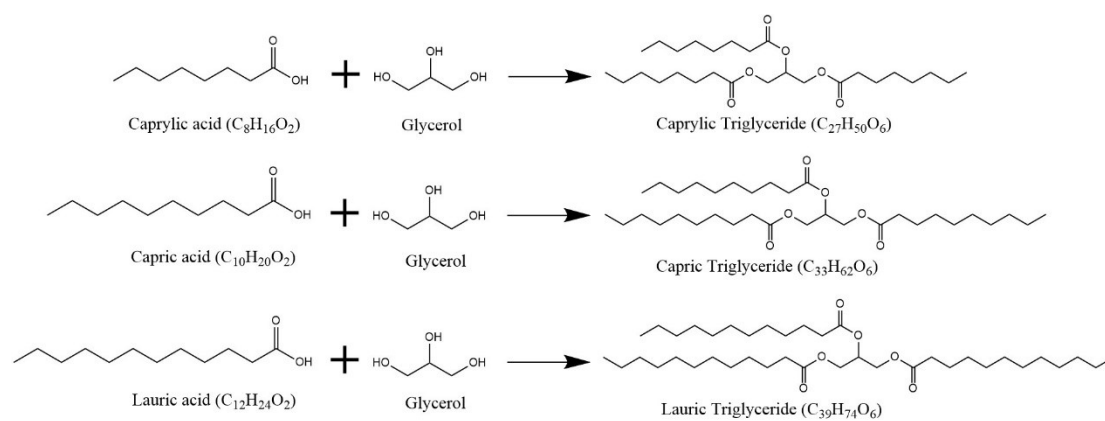

**Figure S2 The chemical formula and schematic diagram of three MCT**

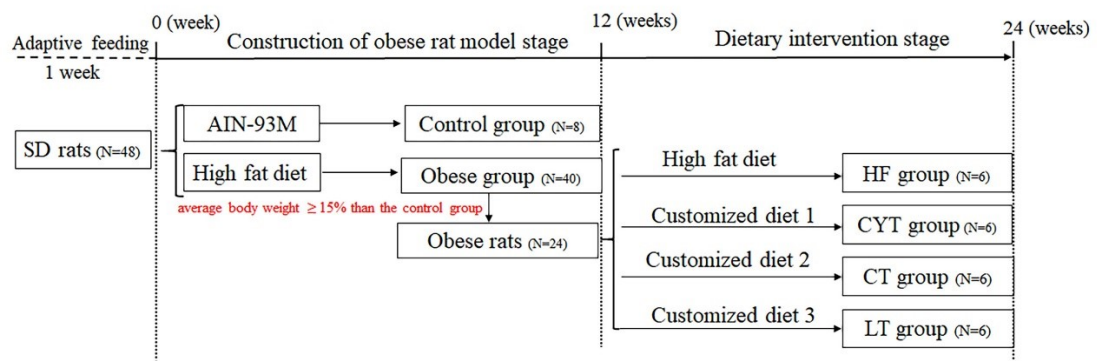

**Figure S3 Description of the animal experiment**

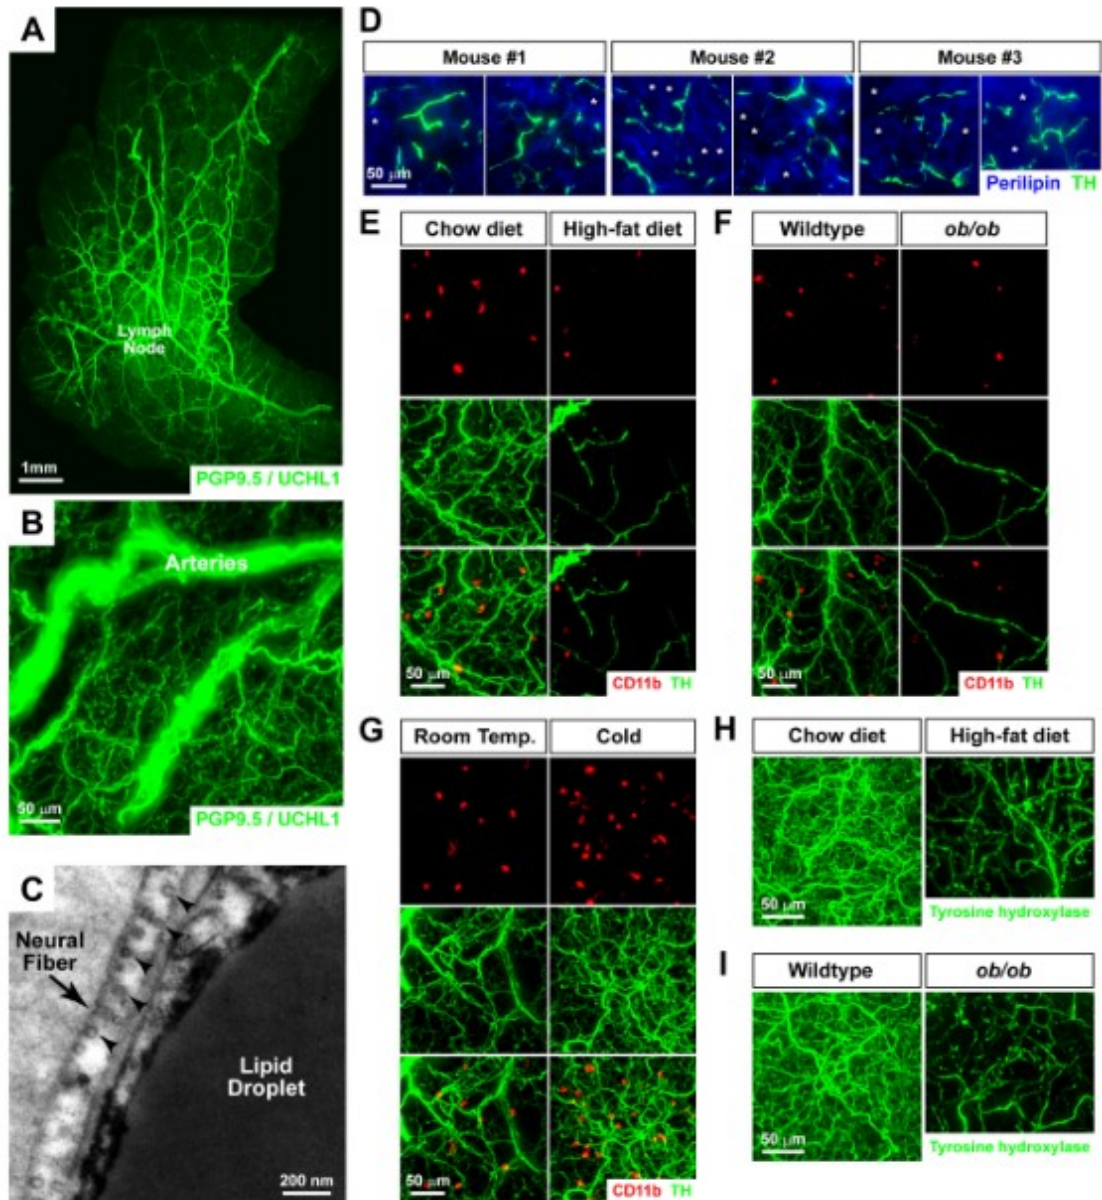

**Figure S4** Whole-mount immunolabeling and volume fluorescence-imaging of mouse adipose tissues <sup>1</sup>

## REFERENCE

1. Jiang, H. C.; Ding, X. F.; Cao, Y.; Wang, H. H.; Zeng, W. W., Dense Intra-adipose Sympathetic Arborizations Are Essential for Cold-Induced Beiging of Mouse White Adipose Tissue. *Cell Metab* **2017**, *26*, 686-+.
